# Supplementary material for: Co-photolysis of mixed chromophores affects atmospheric lifetimes of brown carbon
Source: Royal Society of Chemistry journal article supplement (doi:10.1039/d3ea00073g), 2023-01-01
Supplement: d3ea00073g1.pdf [file d3ea00073g1.pdf]

Supporting information for

**Co-photolysis of Mixed Chromophores Affects Atmospheric Lifetimes of Brown Carbon**

Yalin Wang<sup>a</sup>, Tian Qiu<sup>a</sup>, Cong Zhang<sup>a</sup>, Tianwei Hao<sup>a</sup>, Brix Raphael Go<sup>b</sup>, Ruifeng Zhang<sup>b</sup>, Masao Gen<sup>c</sup>, Man Nin Chan<sup>d</sup>, Dan Dan Huang<sup>e</sup>, Xinlei Ge<sup>f</sup>, Junfeng Wang<sup>f</sup>, Lin Du<sup>g</sup>, Ru-Jin Huang<sup>h</sup>, Qi Chen<sup>i</sup>, Ka In Hoi<sup>a</sup>, Kai Meng Mok<sup>a</sup>, Chak K. Chan<sup>b,j</sup>, Yong Jie Li<sup>a,\*</sup>

<sup>a</sup>Department of Civil and Environmental Engineering, Department of Ocean Science and Technology, and Centre for Regional Oceans, Faculty of Science and Technology, University of Macau, Macau 999078, China

<sup>b</sup>School of Energy and Environment, City University of Hong Kong, Hong Kong 999077, China

<sup>c</sup>Institute of Multidisciplinary Research for Advanced Materials, Tohoku University, 2-1-1, Katahira, Sendai, Miyagi 980-8577, Japan

<sup>d</sup>Earth System Science Programme, Faculty of Science, and the Institute of Environment, Energy, and Sustainability, The Chinese University of Hong Kong, Hong Kong 999077, China

<sup>e</sup>Shanghai Academy of Environmental Sciences, Shanghai 200233, China

<sup>f</sup>Jiangsu Key Laboratory of Atmospheric Environment Monitoring and Pollution Control (AEMPC), School of Environmental Science and Engineering, Nanjing University of Information Science & Technology, Nanjing 210044, China

<sup>g</sup>Environment Research Institute, Shandong University, Shanda South Road 27, Shandong 250100, China

<sup>h</sup>State Key Laboratory of Loess and Quaternary Geology, Institute of Earth Environment, Chinese Academy of Sciences, Xi'an 710061, China

<sup>i</sup>State Key Joint Laboratory of Environmental Simulation and Pollution Control, BIC-ESAT and IJRC, College of Environmental Sciences and Engineering, Peking University, Beijing 100871, China

<sup>j</sup>Physical Sciences and Engineering Division, King Abdullah University of Science and Technology, Kingdom of Saudi Arabi

\*Correspondence should be addressed to:

Yong Jie Li: yongjieli@um.edu.mo

**Summary:** 14 pages, 7 figures, 4 tables, 1 scheme

### 39 Section S1. Determining the fraction of light absorption

40 For co-photolysis of two BrC chromophores, the effective quantum yields were calculated  
41 via:

$$42 \quad \Phi_{e,1} = \frac{k_1 c_1}{\sum I_0(\lambda) \times (1 - 10^{-[\varepsilon_1(\lambda)c_1 + \varepsilon_2(\lambda)c_2] \times l}) \times f_1(\lambda) \times \Delta\lambda}, \quad f_1(\lambda) = \frac{\varepsilon_1(\lambda)c_1}{\varepsilon_1(\lambda)c_1 + \varepsilon_2(\lambda)c_2} \quad (S1)$$

$$43 \quad \Phi_{e,2} = \frac{k_2 c_2}{\sum I_0(\lambda) \times (1 - 10^{-[\varepsilon_1(\lambda)c_1 + \varepsilon_2(\lambda)c_2] \times l}) \times f_2(\lambda) \times \Delta\lambda}, \quad f_2(\lambda) = \frac{\varepsilon_2(\lambda)c_2}{\varepsilon_1(\lambda)c_1 + \varepsilon_2(\lambda)c_2} \quad (S2)$$

44 where  $k$  is photolysis rate constants ( $s^{-1}$ );  $\varepsilon_1$  and  $\varepsilon_2$  are molar absorption coefficients ( $M^{-1} cm^{-1}$ ) of  
45 BrC 1 and 2, respectively;  $l$  is the optical path (cm);  $I(\lambda)$  is light intensity ( $Einstein L^{-1} s^{-1} nm^{-1}$ );  
46 and  $c_1$  and  $c_2$  (M) are concentrations of BrC 1 and 2, respectively.

### 47 Section S2. Correction factor for quantum yield

48 The photolysis rate of 2-nitrobenzaldehyde (2NB), a chemical actinometer<sup>1</sup>, was measured in  
49 photolysis experiments under the same conditions with BrC (co-) photolysis in this study. The  
50 photolysis rate constant,  $k_{2NB}$ , was calculated by fitting the  $\ln\left(\frac{[2NB_t]}{[2NB_0]}\right)$  vs. illumination time (t) as  
51 the following equation:

$$52 \quad \ln\left(\frac{[2NB_t]}{[2NB_0]}\right) = -k_{2NB}t \quad (S3)$$

53 where  $[2NB_t]$  and  $[2NB_0]$  are the concentrations of 2NB measured at time t and 0 min,  
54 respectively.

55 The quantum yield of 2NB photolysis in our experiments was calculated by the following  
56 equation<sup>2</sup>:

$$57 \quad \Phi_{2NB} = \frac{k_{2NB} c}{\sum I(\lambda) (1 - 10^{-\varepsilon(\lambda) \times c \times l}) \Delta\lambda} \quad (S4)$$

58 where  $c$  is the concentration (M) of 2NB (0.02 mM);  $I(\lambda)$  is volume-normalized light intensity  
59 ( $Einstein L^{-1} s^{-1} nm^{-1}$ ) of the lamp;  $\varepsilon(\lambda)$  is the molar absorption coefficient ( $M^{-1} cm^{-1}$ ); and  $l$  is the  
60 optical path (2.2 cm in this study).

61 The correction factor for the quantum yield of BrC photolysis is calculated as:

$$f_{2NB,corr} = \frac{\Phi}{\Phi_{2NB}} = \frac{0.41}{\Phi_{2NB}} \quad (S5)$$

where  $\Phi$  is the intrinsic quantum yield of 2NB (0.41) reported in a previous study.<sup>1</sup>

### Section S3. Estimation of atmospheric lifetime for particles containing BrC

Generally, the atmospheric lifetimes ( $\tau$ , s) (Eq. S6) for the BrC chromophores are obtained by taking the reciprocal of photolysis rate constants ( $j$ , s<sup>-1</sup>), which are calculated by Eq. S7 (Eq.3 in the main text, Method 1)<sup>3</sup>.

$$\tau = \frac{1}{j} \quad (S6)$$

$$j_1 = 3.82 \times 10^{-21} \Phi \sum F(\lambda) \varepsilon(\lambda) \Delta \lambda \quad (S7)$$

where  $\Phi$  is the intrinsic quantum yield (dimensionless);  $F(\lambda)$  is wavelength-dependent solar flux (photon cm<sup>-2</sup> s<sup>-1</sup> nm<sup>-1</sup>), shown in Figure S2 (yellow line)<sup>3</sup>; and  $\varepsilon(\lambda)$  is the wavelength-dependent molar absorption coefficient (M<sup>-1</sup> cm<sup>-1</sup>).

However, for the concentrated particles containing BrC chromophores, there might be light depletion, especially for the larger particles which have longer light paths. Therefore, another equation, as below (Eq.4 in the main text, Method 2),<sup>2</sup> can be used to take concentration and droplet size into account.

$$j_2 = \frac{\sum \Phi_e I(\lambda) (1 - 10^{-\varepsilon(\lambda) \times c \times l}) \Delta \lambda}{c} \quad (S8)$$

where  $I(\lambda)$  is the volume-normalized solar intensity (Einstein L<sup>-1</sup> s<sup>-1</sup> nm<sup>-1</sup>), which is converted from solar flux  $F(\lambda)$  with particle size considered;  $c$  is the concentration (M); and  $\Phi_e$  is the effective quantum yield, equivalent to the  $\Phi$  in Eq. S7 if determined from dilute solutions.

Using the data obtained in the 0.05 mM and 500 mM of VL in IPA solutions, we estimated the atmospheric lifetimes of VL with particle radius from 100 nm to 10  $\mu$ m, as shown in Figure S7, and the details of processing are shown as follows.

#### S3.1 VL at 0.05 mM (dilute)

We calculated the average light-absorbing fractions ( $f_{abs}$ ) of the sunlight for particles with 0.05-mM VL and a radius of 100 nm, 1000 nm or 10  $\mu$ m by Eq. S9 (Eq.2 in the main text) below.

$$f_{abs} = \frac{\sum_{300}^{380} (1 - 10^{-\varepsilon(\lambda) \times c \times l})}{380 - 300} \quad (S9)$$

88 where  $\varepsilon(\lambda)$  is the wavelength-dependent molar absorption coefficient ( $\text{M}^{-1} \text{cm}^{-1}$ ) for VL within  
 89 300–380 nm, as shown in Figure S2 (blue line);  $c$  is the concentration (M) of VL; and  $l$  is the  
 90 optical path (cm), being  $10^{-5}$ ,  $10^{-4}$ ,  $10^{-3}$  cm, respectively, for the three particle sizes simulated.

91 The  $f_{\text{abs}}$  values for 0.05-mM VL particles of 100 nm, 1000 nm and 10  $\mu\text{m}$  (radius, same  
 92 hereinafter unless stated otherwise) are much lower than 0.01, which indicates that there is little  
 93 shadowing effect for the 0.05-mM scenario for particles containing VL. Therefore, the  $\Phi_e$  values  
 94 for these particles are very close to the that obtained in dilute bulk solution (0.05 mM), with a  
 95 value of  $0.002 \pm 0.0004$ . Since there is no difference between Method 1 ( $j_1$ ) and Method 2 ( $j_2$ ) at  
 96 low concentrations ( $< 5$  mM) (Figure S5A), we used the simplified equation Eq. S7 (Method 1) to  
 97 calculate the  $j$  values. The  $j$  values for particles of 100 nm, 1000 nm and 10  $\mu\text{m}$  were similar, at  
 98 about  $(1.28 \pm 0.29) \times 10^{-4} \text{ s}^{-1}$ . The inferred atmospheric lifetime for these cases is  $2.17 \pm 0.49$  h,  
 99 independent of particle size.

### 100 **S3.2 VL at 500 mM (concentrated)**

101 For particles containing VL of 500 mM, the  $f_{\text{abs}}$  value for 100-nm particles is 0.04 as calculated  
 102 by Eq. S9 and thus there is little shadowing effect, similar to the “dilute” scenario in Section S3.1  
 103 above. Therefore, the  $\Phi_e$  value is close to that derived from experiments in dilute bulk solutions  
 104 (0.05 mM), being  $0.002 \pm 0.0004$ . Using Eq. S7 (Method 1), the  $j$  value for 500-mM VL in 100-  
 105 nm particles (radius) was calculated to be  $(1.24 \pm 0.25) \times 10^{-4} \text{ s}^{-1}$ , and the inferred atmospheric  
 106 lifetime was estimated to be  $2.24 \pm 0.44$  h, similar to that in the 0.05-mM scenario.

107 For 1000-nm particles, however, the  $f_{\text{abs}}$  value was calculated to be 0.28 using Eq. S9.  
 108 Therefore, there is only partial shadowing (light absorbed partly but not depleted) and the  $\Phi_e$  value  
 109 is still similar to that in dilute bulk solution ( $0.002 \pm 0.0004$ ). Considering the longer light path for  
 110 1000-nm particles, the  $j$  value was calculated by Eq. S8 (Method 2), where the volume-normalized  
 111 solar intensity ( $I(\lambda)$ , Einstein  $\text{L}^{-1} \text{s}^{-1} \text{nm}^{-1}$ ) is converted from solar flux ( $F(\lambda)$ , photon  $\text{cm}^{-2} \text{s}^{-1} \text{nm}^{-1}$ )  
 112 with particle size considered. The  $j$  value for 1000-nm particles with 500-mM VL was calculated  
 113 to be  $(9.72 \pm 1.94) \times 10^{-5} \text{ s}^{-1}$ . The atmospheric lifetime was thus estimated to be  $2.86 \pm 0.57$  h, 32%  
 114 longer than that for the scenario with 0.05 mM VL and 1000-nm particles, which is mainly caused  
 115 by the shadowing effect due to a lower volume-normalized photon flux.

116 For 10- $\mu\text{m}$  VL particles, the  $f_{\text{abs}}$  value is 0.65 as calculated by Eq. S9. The shadowing effect  
 117 is significant as the light is almost depleted, and thus the  $\Phi_e$  value should be similar to that derived  
 118 from experiments using 500-mM bulk solutions ( $1.48 \pm 0.6$ ). The  $j$  value for 10- $\mu\text{m}$  particles with

119 500-mM VL was calculated by Eq. S8 (Method 2) to be  $(2.66 \pm 1.08) \times 10^{-2} \text{ s}^{-1}$ . The atmospheric  
120 lifetime was estimated to be  $0.01 \pm 0.004 \text{ h}$ , two orders of magnitude less than that for 10- $\mu\text{m}$   
121 particles with 0.05 mM VL, which is mainly caused by the significant sensitizing effect under the  
122 light depletion condition. Note that although the sensitizing effect might play a major role in the  
123 accelerated degradation of VL, shadowing might also contribute indirectly because a high  $f_{\text{abs}}$  value  
124 will leaves a great portion of VL molecules in the ground state and react with photosensitization-  
125 generated reactive intermediates.

126 Tables

127 Table S1 Experimental conditions of aqueous-phase BrC photolysis.

| BrC | Concentration (mM) | Standalone | + VA (mM) |     | + VL (mM) |     | + 4NC (mM) |     | + 4NP (mM) |     |
|-----|--------------------|------------|-----------|-----|-----------|-----|------------|-----|------------|-----|
|     |                    |            | 0.05      | 0.5 | 0.05      | 0.5 | 0.05       | 0.5 | 0.05       | 0.5 |
| VA  | 0.02               | +          |           |     |           |     |            |     |            |     |
|     | 0.05               | +          |           |     | +         | +   | +          | +   |            |     |
|     | 0.5                | +          |           |     | +         | +   | +          | +   |            |     |
|     | 2                  | +          |           |     |           |     |            |     |            |     |
|     | 5                  | +          |           |     |           |     |            |     |            |     |
| VL  | 0.02               | +          |           |     |           |     |            |     |            |     |
|     | 0.05               | +          | +         | +   |           |     | +          | +   |            |     |
|     | 0.5                | +          | +         | +   |           |     | +          | +   |            |     |
|     | 2                  | +          |           |     |           |     |            |     |            |     |
|     | 5                  | +          |           |     |           |     |            |     |            |     |
| 4NC | 0.02               | +          |           |     |           |     |            |     |            |     |
|     | 0.05               | +          | +         | +   | +         | +   |            |     | +          | +   |
|     | 0.5                | +          | +         | +   | +         | +   |            |     | +          | +   |
|     | 2                  | +          |           |     |           |     |            |     |            |     |
|     | 5                  | +          |           |     |           |     |            |     |            |     |
| 4NP | 0.02               | +          |           |     |           |     |            |     |            |     |
|     | 0.05               | +          |           |     | +         | +   | +          | +   |            |     |
|     | 0.5                | +          |           |     | +         | +   | +          | +   |            |     |
|     | 2                  | +          |           |     |           |     |            |     |            |     |
|     | 5                  | +          |           |     |           |     |            |     |            |     |

Note: Each “+” represents an experiment conducted under air-saturated condition.

128

129 Table S2 Experimental conditions of BrC photolysis in isopropanol (IPA) solutions.

| BrC | Concentration (mM) | Standalone | + VL (mM) |   | + 4NC (mM) |     |
|-----|--------------------|------------|-----------|---|------------|-----|
|     |                    |            | 0.05      | 5 | 0.05       | 0.5 |
| VL  | 0.05               | +          |           |   | +          | +   |
|     | 5                  | +          |           |   |            | +   |
|     | 500                | +          |           |   |            |     |
| 4NC | 0.05               | +          | +         |   |            |     |
|     | 0.5                | +          | +         | + |            |     |
|     | 5                  | +          |           |   |            |     |

Note: Each “+” represents an experiment conducted under air-saturated condition.

130

131 Table S3 Experimental conditions of aqueous-phase BrC photolysis under N<sub>2</sub>-saturated conditions.

| BrC | Concentration (mM) | Standalone | + VL (mM) |     | + 4NC (mM) |     |
|-----|--------------------|------------|-----------|-----|------------|-----|
|     |                    |            | 0.05      | 0.5 | 0.05       | 0.5 |
| VA  | 0.05               | +          |           |     |            |     |
|     | 0.5                | +          |           |     |            |     |
|     | 5                  | +          |           |     |            |     |
| VL  | 0.05               | +          |           |     | +          | +   |
|     | 0.5                | +          |           |     | +          | +   |
|     | 5                  | +          |           |     |            |     |
| 4NC | 0.05               | +          | +         | +   |            |     |
|     | 0.5                | +          | +         | +   |            |     |
|     | 5                  | +          |           |     |            |     |
| 4NP | 0.05               | +          |           |     |            |     |
|     | 0.5                | +          |           |     |            |     |
|     | 5                  | +          |           |     |            |     |

Note: Each “+” represents an experiment conducted under N<sub>2</sub>-saturated condition.

132

133

134 Table S4 Main products of VL photolysis alone or co-photolysis with 4NC.

135

| VL photolysis  | Formula                                         | Pathway        | Ion peak                                                     | m/z calculated | m/z measured | Δ (mDa) |
|----------------|-------------------------------------------------|----------------|--------------------------------------------------------------|----------------|--------------|---------|
| Alone or mixed | C <sub>8</sub> H <sub>8</sub> O <sub>4</sub>    | Hydroxylation  | C <sub>8</sub> H <sub>7</sub> O <sub>4</sub> <sup>-</sup>    | 167.0344       | 167.0348     | 0.4     |
| Alone or mixed | C <sub>16</sub> H <sub>14</sub> O <sub>6</sub>  | Dimerization   | C <sub>16</sub> H <sub>13</sub> O <sub>6</sub> <sup>-</sup>  | 301.0712       | 301.0713     | 0.1     |
| Mixed          | C <sub>14</sub> H <sub>11</sub> NO <sub>7</sub> | Cross-reaction | C <sub>14</sub> H <sub>10</sub> NO <sub>7</sub> <sup>-</sup> | 304.0457       | 304.0462     | 0.5     |

136

137 Scheme

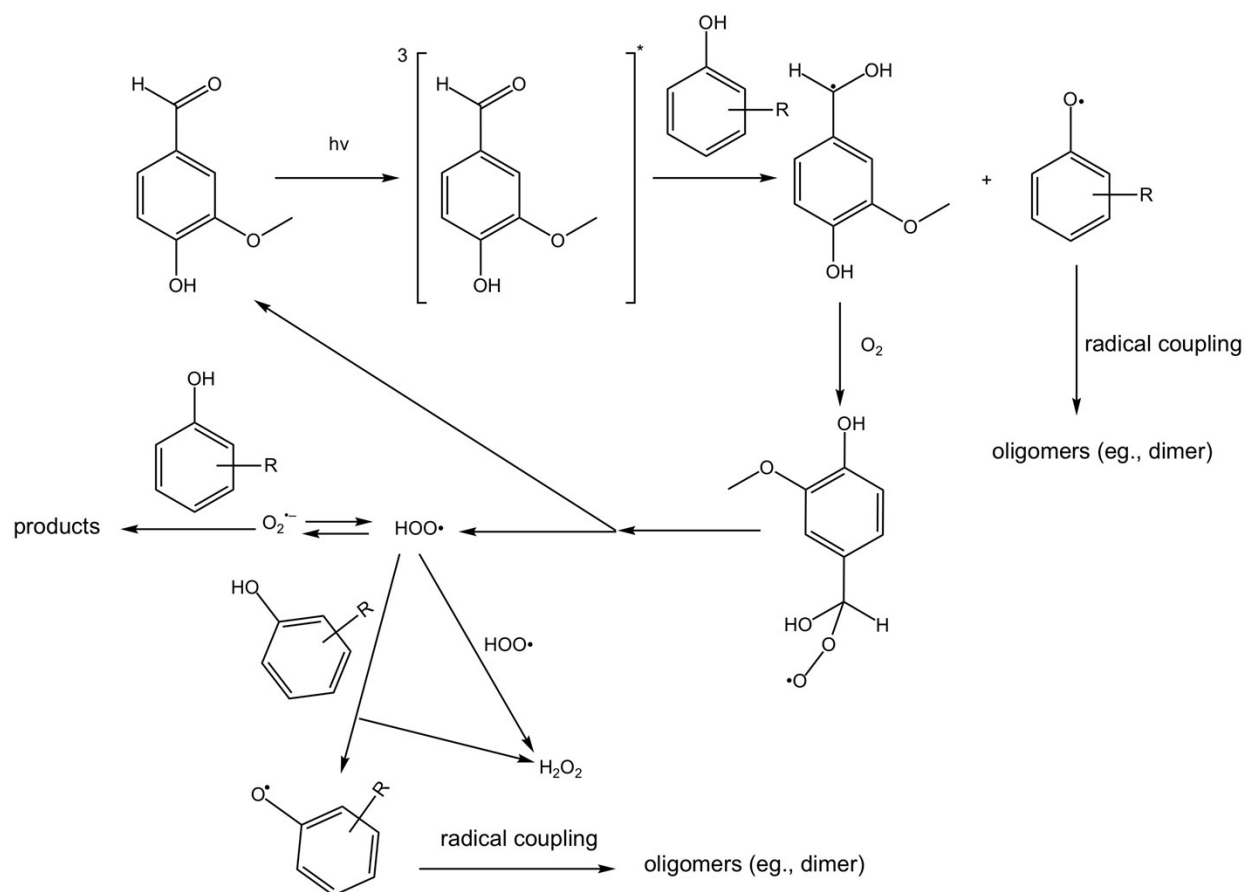

138

139 Scheme S1 Possible mechanisms in the photosensitization reactions by vanillin (VL) with phenols,  
 140 including itself, and other phenols such as vanillic acid (VA), 4-nitrocatechol (4NC), 4-nitrophenol  
 141 (4NP) used in this study, which are all denoted with an unspecific “-R” group on the phenolic ring.



142 Figures

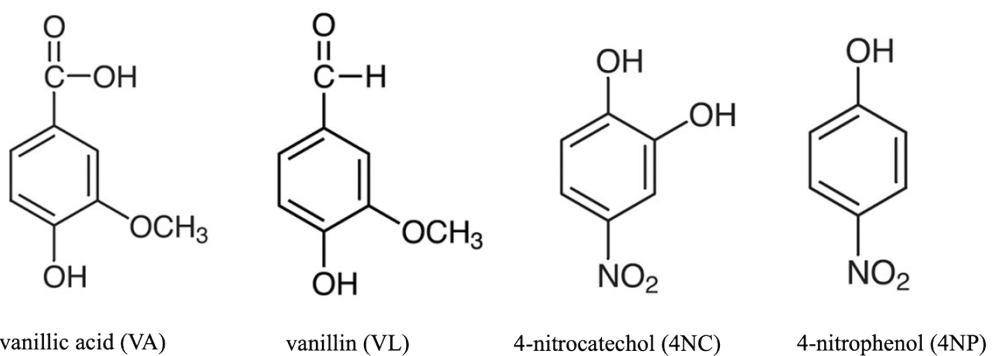

143

144 Fig. S1 Structures of the BrC model compounds used in this work.

145

146

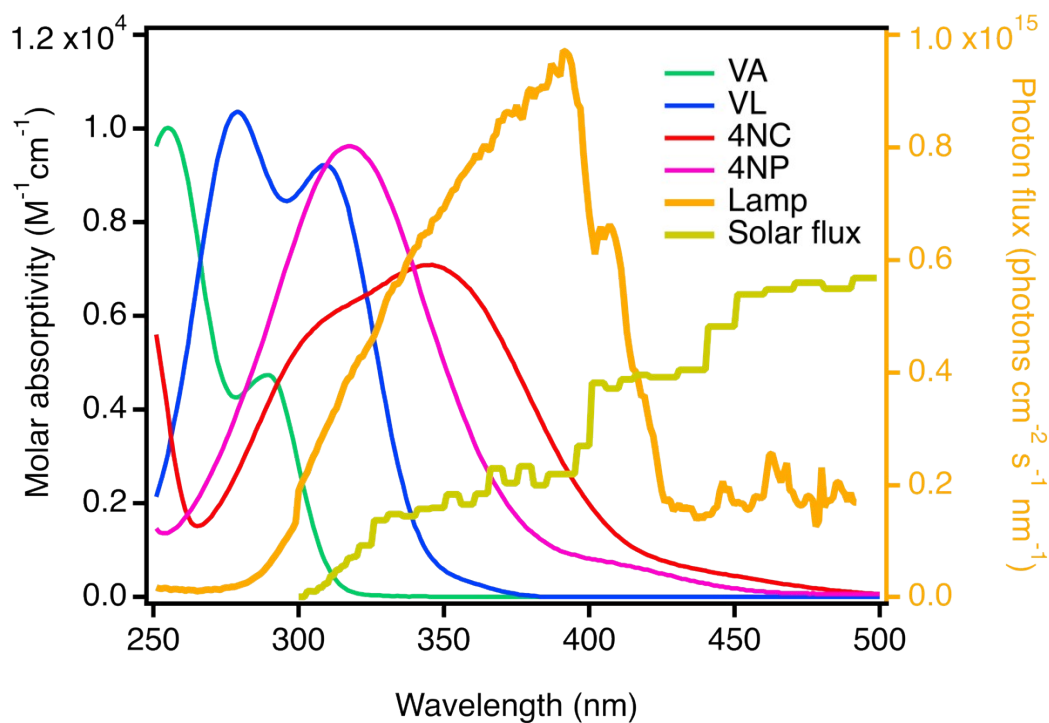

147

148

149 Fig. S2 Molar absorptivity of vanillic acid (VA), vanillin (VL), 4-nitrocatechol (4NC), and 4-  
150 nitrophenol (4NP) and the photon flux of our lamp (orange line) and solar flux<sup>3</sup> (yellow line).

151

152

153

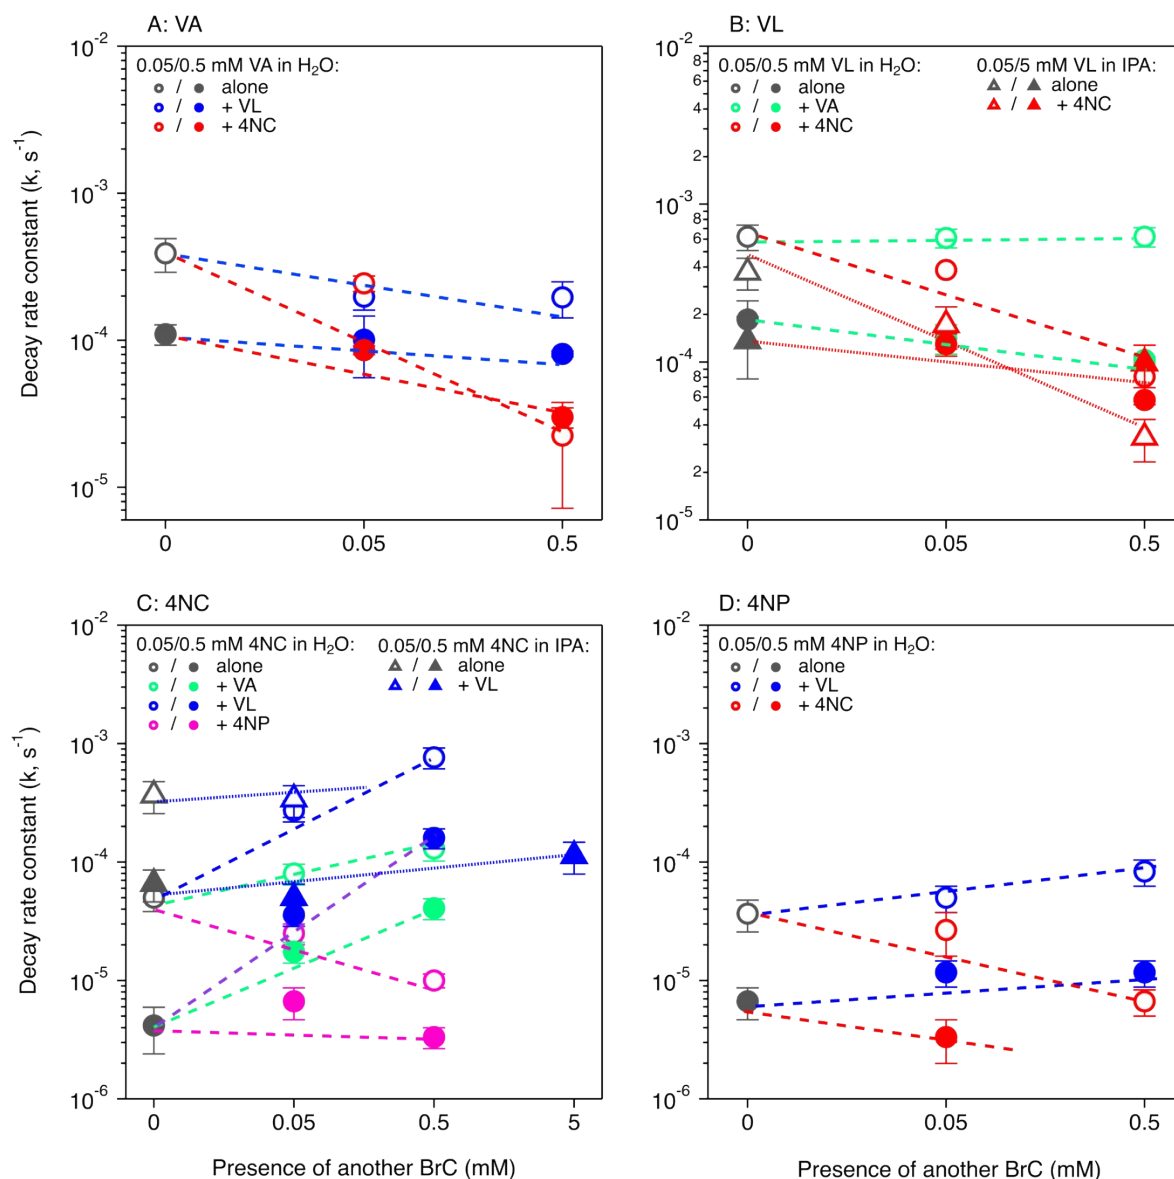

155

156

157 Fig. S3 Decay rate constant ( $k$ ,  $s^{-1}$ ) of (A) vanillic acid (VA), (B) vanillin (VL), (C) 4-nitrocatechol  
 158 (4NC), and (D) 4-nitrophenol (4NP) under three mixing conditions: MP + MP, NP + NP, and MP  
 159 + NP. The circles are data from experiments in aqueous solutions, while triangles are data from  
 160 experiments in isopropanol (IPA) solutions. The hollow and solid symbols represent the data for  
 161 lower concentration (0.05 mM) and higher concentration (0.5 or 5 mM), respectively. The dashed  
 162 and dotted lines are not fitting results and are merely to guide the eyes. The error bars represent  
 163 the standard deviations from the results of triplicate experiments.

164

165

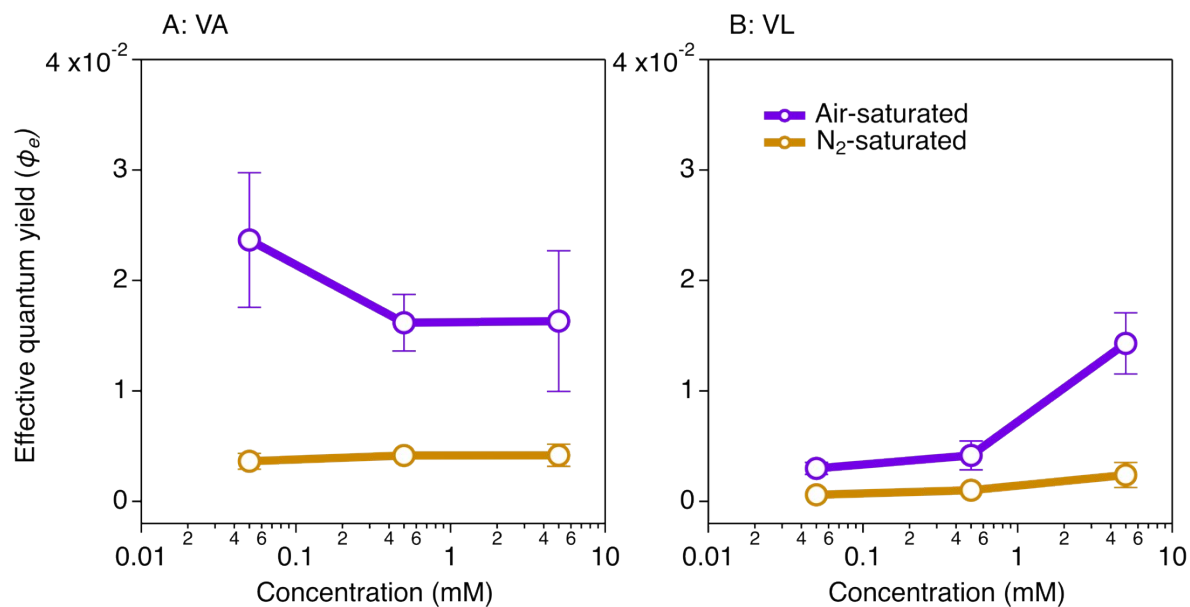

166

167

168 Fig. S4 Effective quantum yield ( $\Phi_e$ ) of (A) vanillic acid (VA) and (B) vanillin (VL) as a function  
 169 of concentration under air- or N<sub>2</sub>-saturated conditions.

170

171

172

173

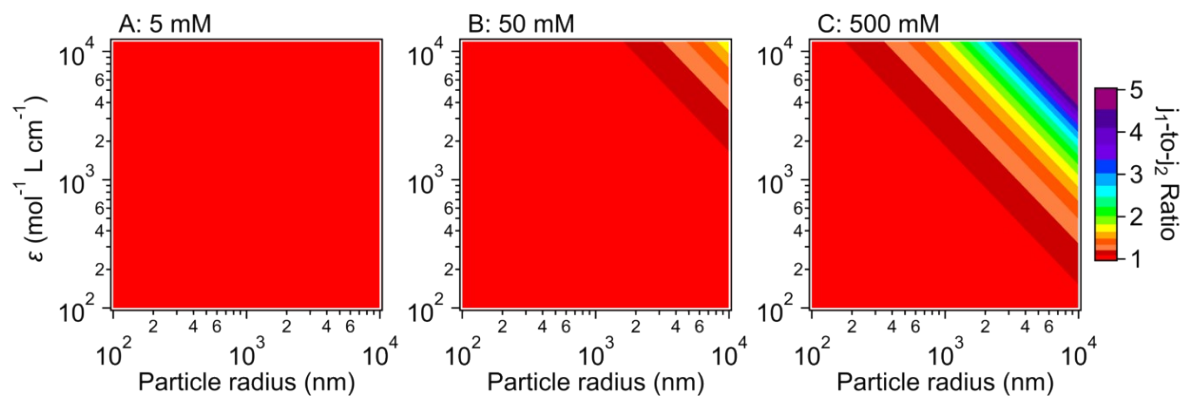

174

175 Fig. S5 Ratio of  $j_1$  value to  $j_2$  value for BrC concentrations at (A) 0.05 mM, (B) 50 mM, and (C)  
 176 500 mM.

177

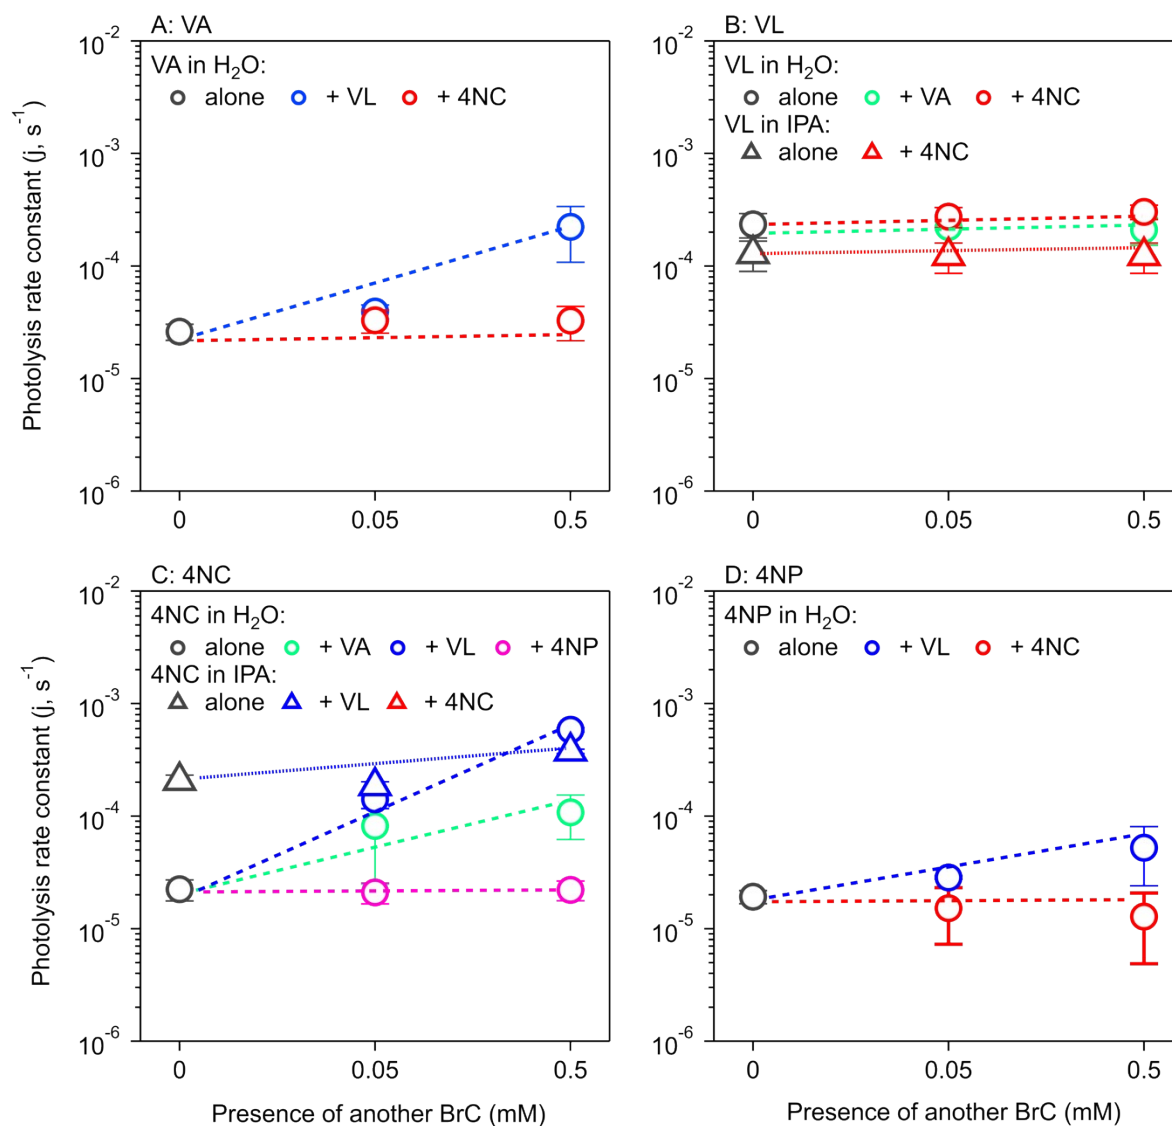

179

180 Fig. S6 Photolysis rate constant ( $j$ ,  $s^{-1}$ ) of (A) vanillic acid (VA), (B) VL (vanillin), (C) 4-  
 181 nitrocatechol (4NC), and (D) 4-nitrophenol (4NP) in aqueous solutions (in hollow black) under  
 182 three mixing cases: MP + MP, NP+ NP, and MP + NP. The estimation assumes particles of 100-  
 183 nm radius and concentration of 0.02–0.5mM. The circles are data from experiments in aqueous  
 184 solutions, while the triangles are data from experiments isopropanol (IPA) solutions. The dashed  
 185 and dotted lines are not fitting results and are merely to guide the eyes.

186

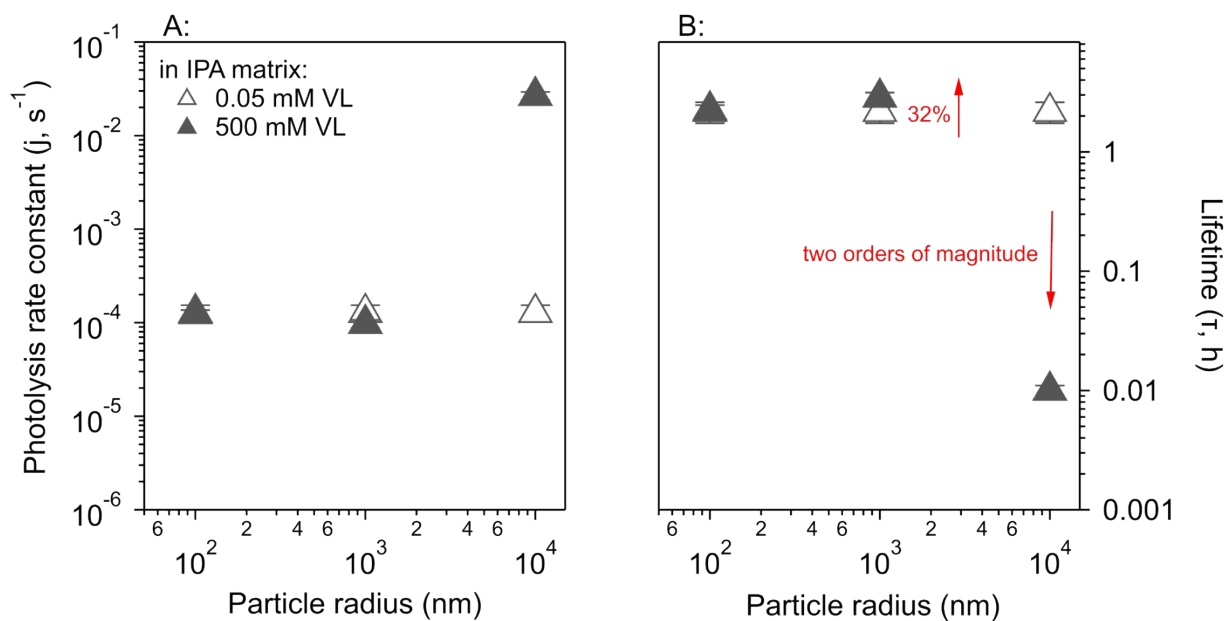

187

188 Fig. S7 Estimation of (A) photolysis rate constant ( $j$ ,  $s^{-1}$ ) and (B) atmospheric lifetime ( $\tau$ , h) of VL  
 189 in IPA matrix with different particle sizes. The error bars represent the standard deviations from  
 190 the results of triplicate experiments.

191

192 **References**

- 193 1. Galbavy, E. S.; Ram, K.; Anastasio, C., 2-Nitrobenzaldehyde as a chemical actinometer  
194 for solution and ice photochemistry. J. Photoch. Photobio. A 2010, 209, (2), 186-192.
- 195 2. Lignell, H.; Epstein, S. A.; Marvin, M. R.; Shemesh, D.; Gerber, B.; Nizkorodov, S.,  
196 Experimental and Theoretical Study of Aqueous cis-Pinonic Acid Photolysis. J. Phys. Chem. A  
197 2013, 117, (48), 12930-12945.
- 198 3. Finlayson-Pitts, B. J.; Pitts, J. N., CHAPTER 3 - Spectroscopy and Photochemistry:  
199 Fundamentals. In Chemistry of the Upper and Lower Atmosphere, Finlayson-Pitts, B. J.; Pitts, J.  
200 N., Eds. Academic Press: San Diego, 2000; pp 43-85.
- 201
